# Supplementary material for: Apoptosis resistance downstream of eIF4E: posttranscriptional activation of an anti-apoptotic transcript carrying a consensus hairpin structure
Source: PubMed Central journal article supplement — Nucleic Acids Res. 2006 Aug 26;34(16):4375–86. doi: 10.1093/nar/gkl558 (PMC1636353; doi:10.1093/nar/gkl558), 2006-08-26
Supplement: nar_34_16_4375__1.pdf [file nar_34_16_4375__1.pdf]

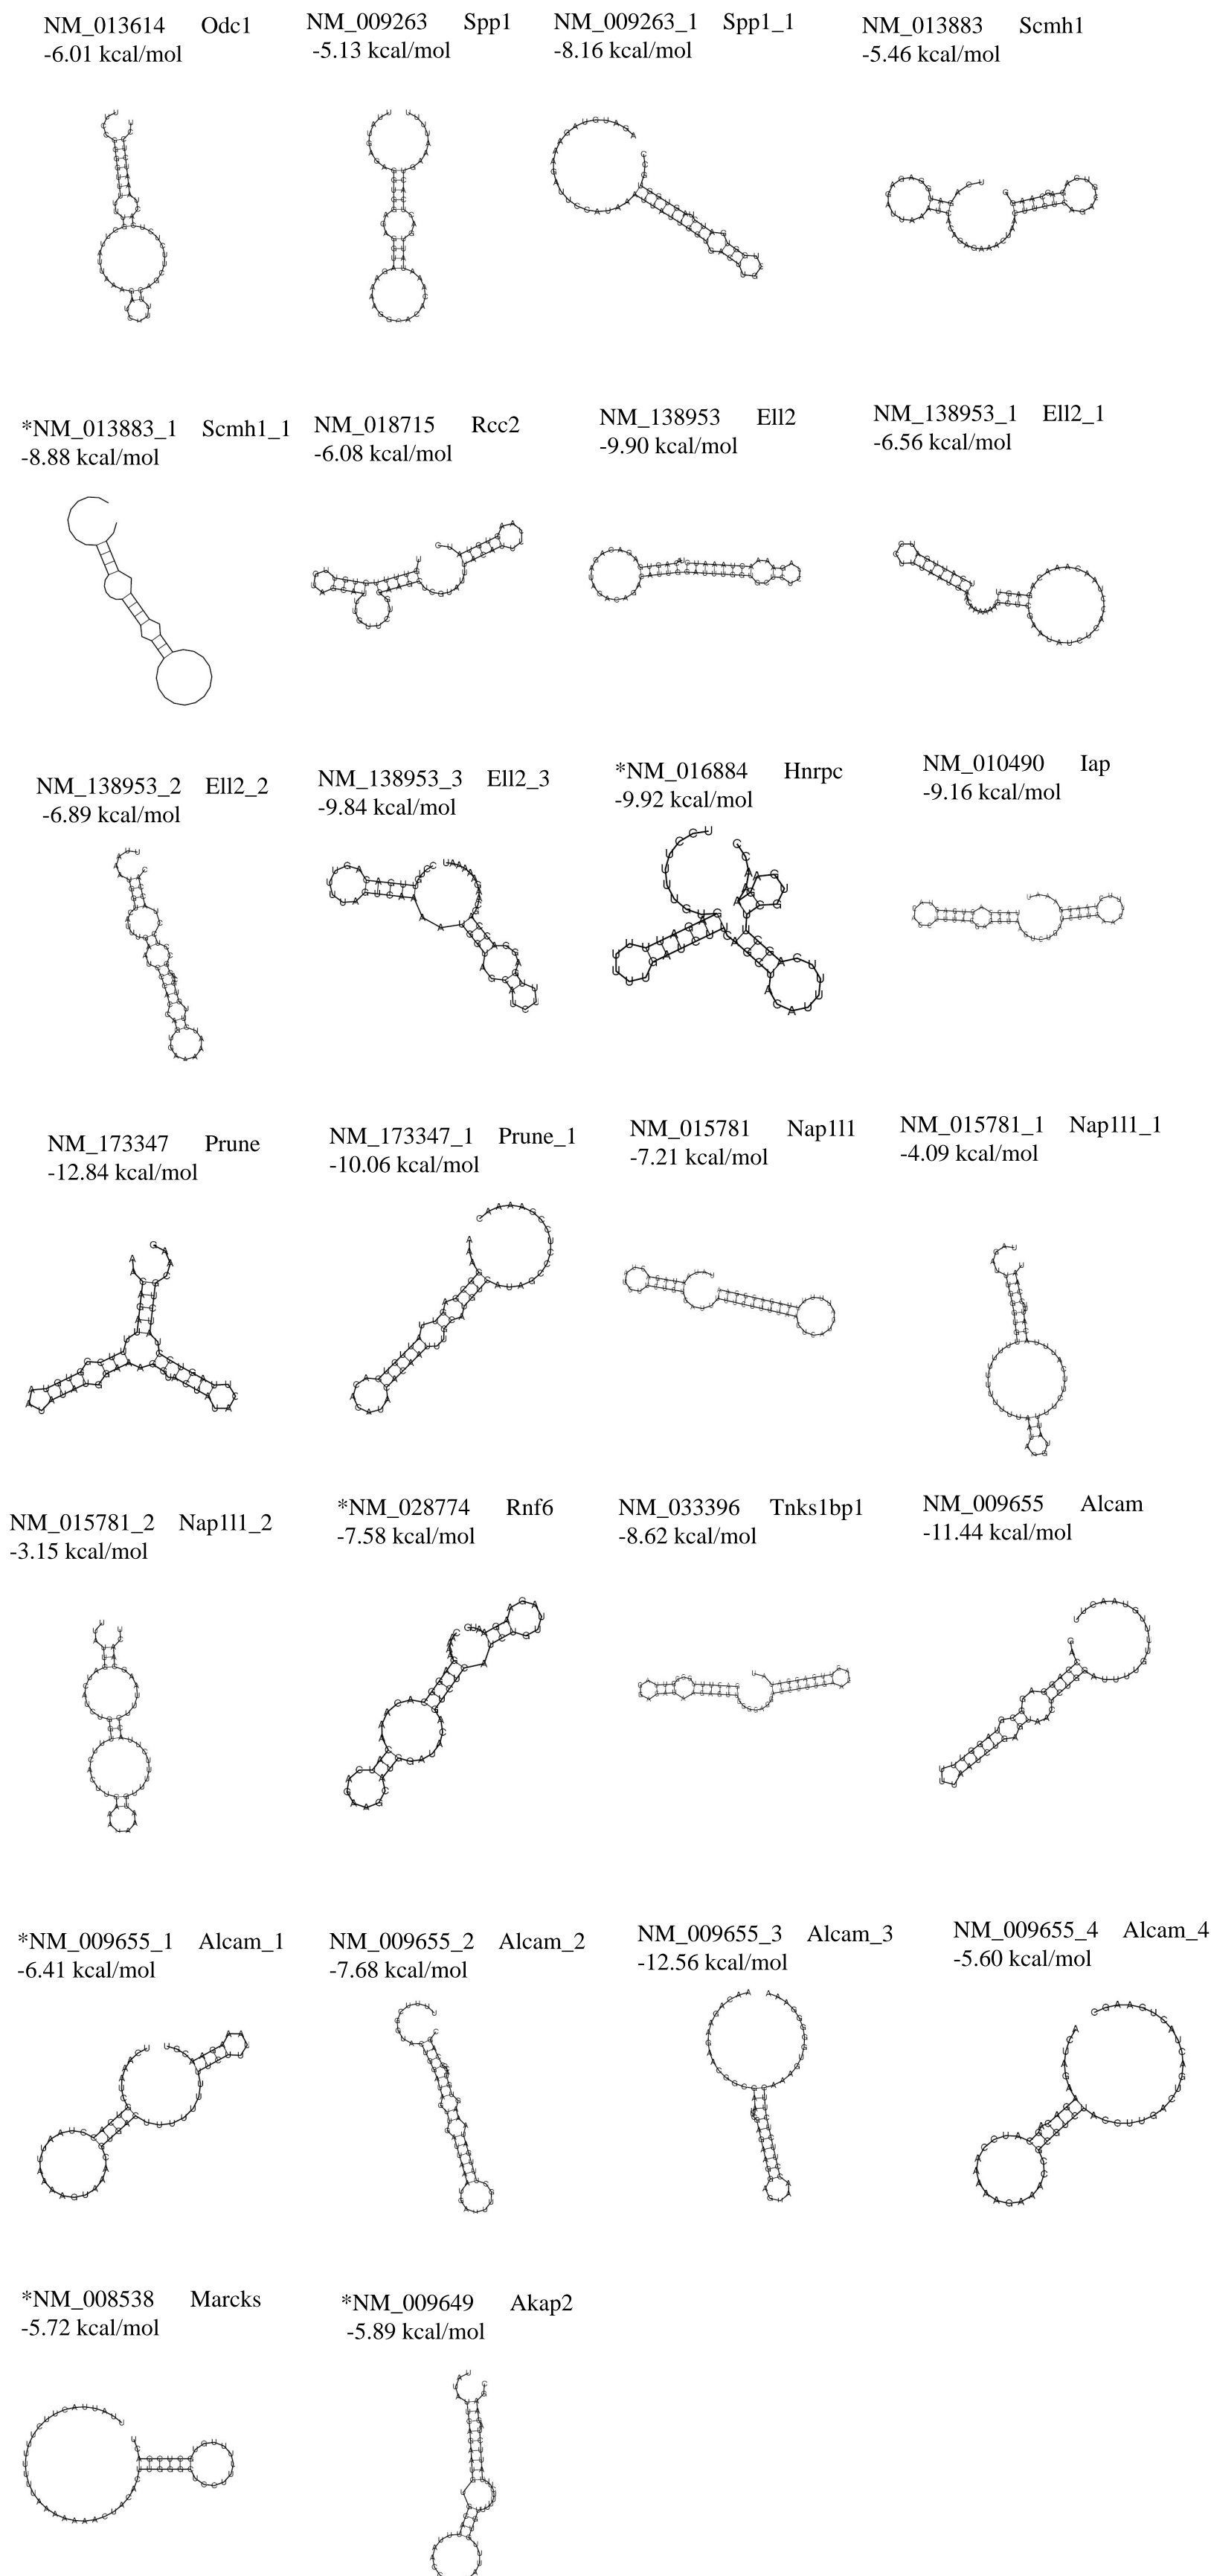

**Supplement figure 1. The structures and the free energies of the 55mers predicted by RNAfold.** The RefSeq IDs and the gene symbols of the transcripts are listed. The suffix indicates multiple copies of the 55mer in the same transcript. \* denotes the conservation of the 55mer between mouse and human or between mouse and rat.
